# Supplementary material for: Molecular recognition-induced structural flexibility in ZIF-71
Source: Royal Society of Chemistry journal article supplement (doi:10.1039/d4ta03813d), 2024-01-01
Supplement: d4ta03813d1.pdf [file d4ta03813d1.pdf]

## Molecular Recognition-Induced Structural Flexibility in ZIF-71

*J. Farrando-Perez,<sup>1</sup> A. Missyul,<sup>2</sup> A. Martín-Calvo,<sup>3</sup> C. Abreu-Jauregui,<sup>1</sup> V. Ramírez-Cerezo,<sup>1,4</sup> L. Daemen,<sup>5</sup> Y.Q. Cheng,<sup>5</sup> A.J. Ramirez-Cuesta,<sup>5</sup> S. Calero,<sup>6</sup> C. Carrillo-Carrión,<sup>7</sup> J. Silvestre-Albero<sup>1,\*</sup>*

<sup>1</sup>Advanced Materials Laboratory, Department of Inorganic Chemistry-University Institute of Materials, University of Alicante, E-03690 San Vicente del Raspeig, Spain

<sup>2</sup>CELLS – ALBA Synchrotron, Cerdanyola del Vallés, Barcelona, Spain

<sup>3</sup>Center for Nanoscience and Sustainable Technologies (CNATS), Dpt. Physical, Chemical and Natural Systems, Universidad Pablo de Olavide, Seville, Spain

<sup>4</sup>Institut Laue-Langevin, 71 avenue des Martyrs, 38000, Grenoble, France

<sup>5</sup>Spallation Neutron Source, Oak Ridge National Laboratory, Oak Ridge, TN 37831, USA

<sup>6</sup>Department of Applied Physics, Eindhoven University of Technology, Eindhoven, The Netherlands

<sup>7</sup>Institute of Chemical Research (IIQ), CSIC – University of Seville, 41092 Seville, Spain

### SUPPORTING INFORMATION

| Figures                                                                                                                                                                                                                                                                                                                                      | Page |
|----------------------------------------------------------------------------------------------------------------------------------------------------------------------------------------------------------------------------------------------------------------------------------------------------------------------------------------------|------|
| <b>Figure S1.</b> Simulated pore size distribution (PSD) for ZIF-71 and ZIF-72.                                                                                                                                                                                                                                                              | S3   |
| <b>Figure S2.</b> Adsorption kinetic studies for (A) phenol and (B) chlorobenzene at 298 K in ZIF-71 sample.                                                                                                                                                                                                                                 | S3   |
| <b>Figure S3.</b> Simulated adsorption isotherms for phenol and chlorobenzene in ZIF-71 and ZIF-72.                                                                                                                                                                                                                                          | S4   |
| <b>Figure S4. A</b> Amplification of the OH and Cl distances in the two probes evaluated with the Cl groups in the ZIF-71 linker, and <b>B</b> Amplification of the intermolecular distances in equilibrium upon adsorption in ZIF-71.                                                                                                       | S5   |
| <b>Figure S5.</b> Immersion calorimetry measurements of ZIF-71 into (A) water, (B) a phenol/water solution, and (C) a chlorobenzene/water solution.                                                                                                                                                                                          | S6   |
| <b>Figure S6.</b> Adsorption kinetic studies for (A) phenol and (B) chlorobenzene at 298 K in ZIF-71 sample under acidic conditions (pH 3.5 adjusted using a HCl solution). Average adsorption kinetics (data from Figure S2), obtained under non-modified pH conditions, have been added as a grey slashed line for the sake of comparison. | S7   |
| <b>Figure S7.</b> Synchrotron X-ray powder diffraction patterns of ZIF-71 before and after the chlorobenzene and phenol adsorption tests under acidic                                                                                                                                                                                        | S7   |

|                                                                                                                                                                                                                                                                                                                          |     |
|--------------------------------------------------------------------------------------------------------------------------------------------------------------------------------------------------------------------------------------------------------------------------------------------------------------------------|-----|
| conditions (beam energy 20 keV).                                                                                                                                                                                                                                                                                         |     |
| <b>Figure S8.</b> Synchrotron X-ray powder diffraction patterns of ZIF-71 before and after the phenol adsorption tests (beam energy 30 keV). The used sample was submitted to a thermal treatment at 453 K to promote the phase transition. Low 2 Theta peaks in ZIF-71@phenol (ca. 1.2°) correspond to entrapped water. | S8  |
| <b>Figure S9.</b> Synchrotron X-ray powder diffraction patterns of ZIF-71 before and after the chlorobenzene adsorption tests (beam energy 17.5 keV). The used sample was submitted to a thermal treatment at 453 K to promote the phase transition.                                                                     | S9  |
| <b>Figure S10.</b> Representative FESEM images of ZIF-71 after the phenol adsorption process, a subsequent drying and a heat treatment at 453 K.                                                                                                                                                                         | S9  |
| <b>Figure S11.</b> Synchrotron X-ray powder diffraction patterns of ZIF-71 before and after exposure to the vapors of an aqueous solution of phenol (50 ppm) (beam energy 20 keV).                                                                                                                                       | S10 |
| <b>Figure S12.</b> Rietveld refinement of the different SXRPD patterns obtained.                                                                                                                                                                                                                                         | S11 |

| Tables                                                                                                                                                                                                                                                      | Page        |
|-------------------------------------------------------------------------------------------------------------------------------------------------------------------------------------------------------------------------------------------------------------|-------------|
| <b>Table S1:</b> Lennard-Jones parameters and partial charges of the atoms from the structures. Different types of atoms were defined for a given element according to their chemical environment. The proposed labelling of atoms is shown below.          | S12         |
| <b>Table S2.</b> Henry coefficients and Heat of adsorption for the three probes evaluated obtained from the GCMC simulations.                                                                                                                               | S12-<br>S13 |
| <b>Table S3:</b> Structural parameters calculated for ZIF-71 before (pristine) and after being applied in the phenol and chlorobenzene adsorption process. The amount of ZIF-72 determined from the Rietveld refinement is included for each specific case. | S13         |

## FIGURES

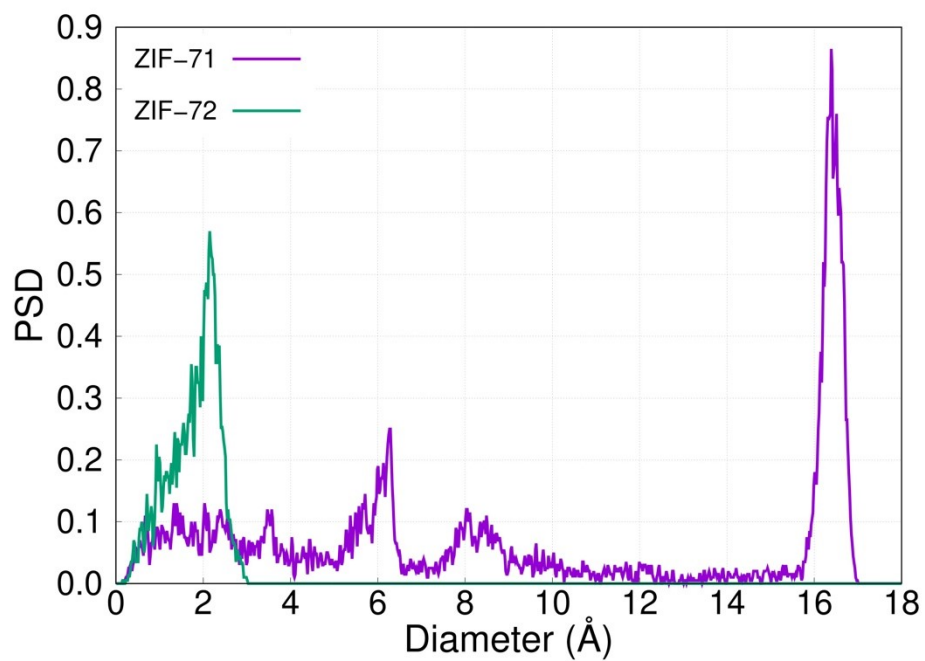

**Figure S1.** Simulated pore size distribution (PSD) for ZIF-71 and ZIF-72.

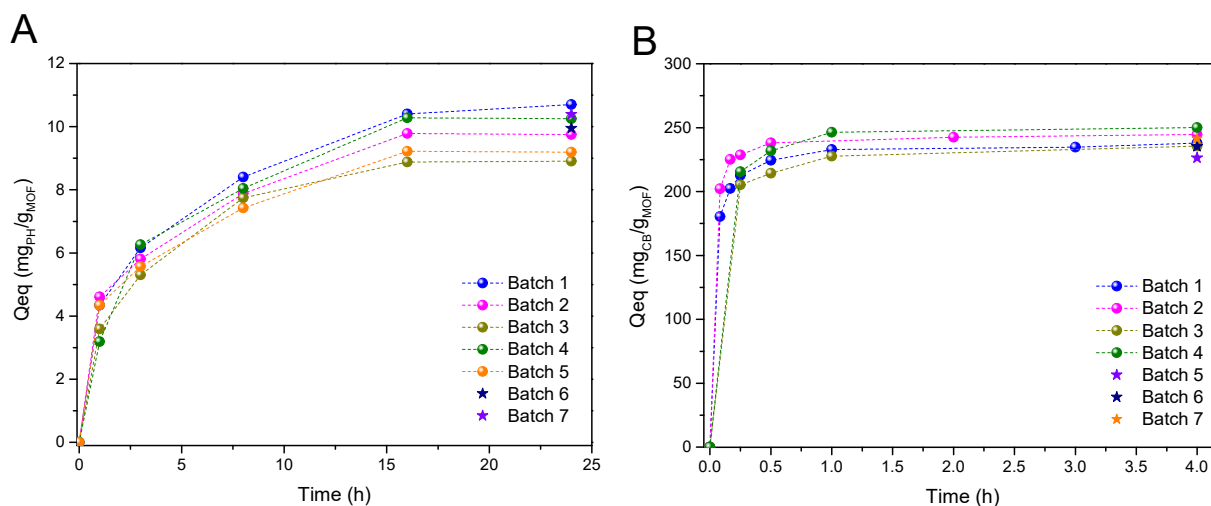

**Figure S2.** Adsorption kinetic studies for (A) phenol and (B) chlorobenzene at 298 K in ZIF-71 sample.

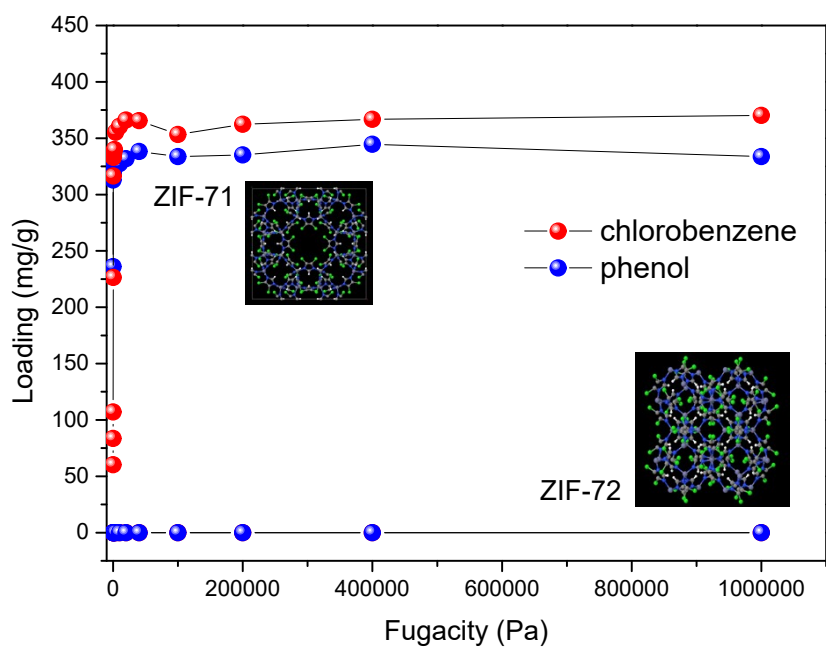

**Figure S3.** Simulated adsorption isotherms for phenol and chlorobenzene in ZIF-71 and ZIF-72.

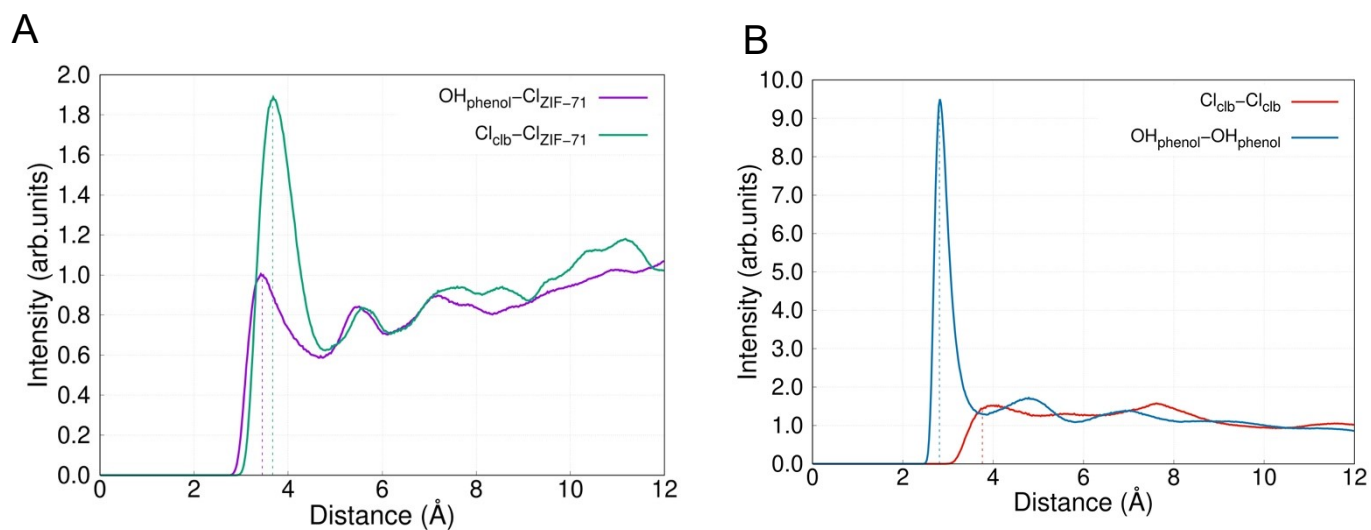

**Figure S4.** **A** Amplification of the OH and Cl distances in the two probes evaluated with the Cl groups in the ZIF-71 linker, and **B** Amplification of the intermolecular distances in equilibrium upon adsorption in ZIF-71.

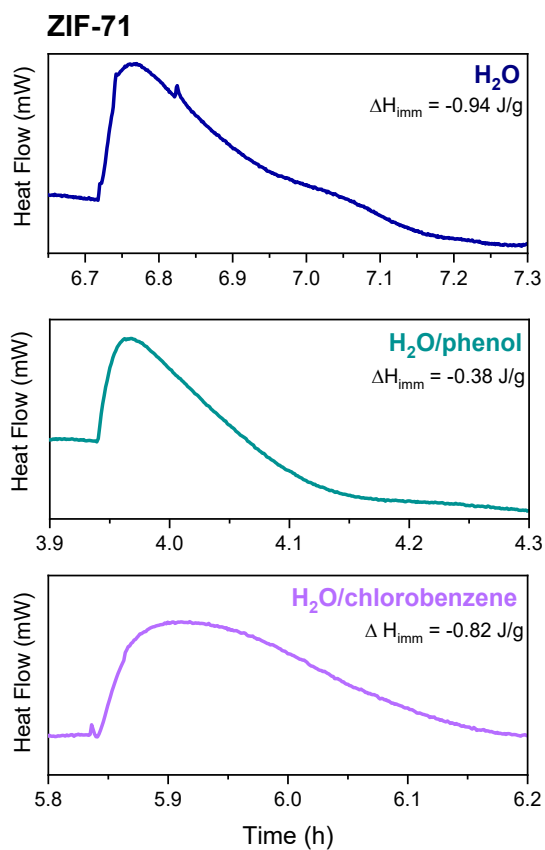

**Figure S5.** Immersion calorimetry measurements of ZIF-71 into (A) water, (B) a phenol/water solution, and (C) a chlorobenzene/water solution.

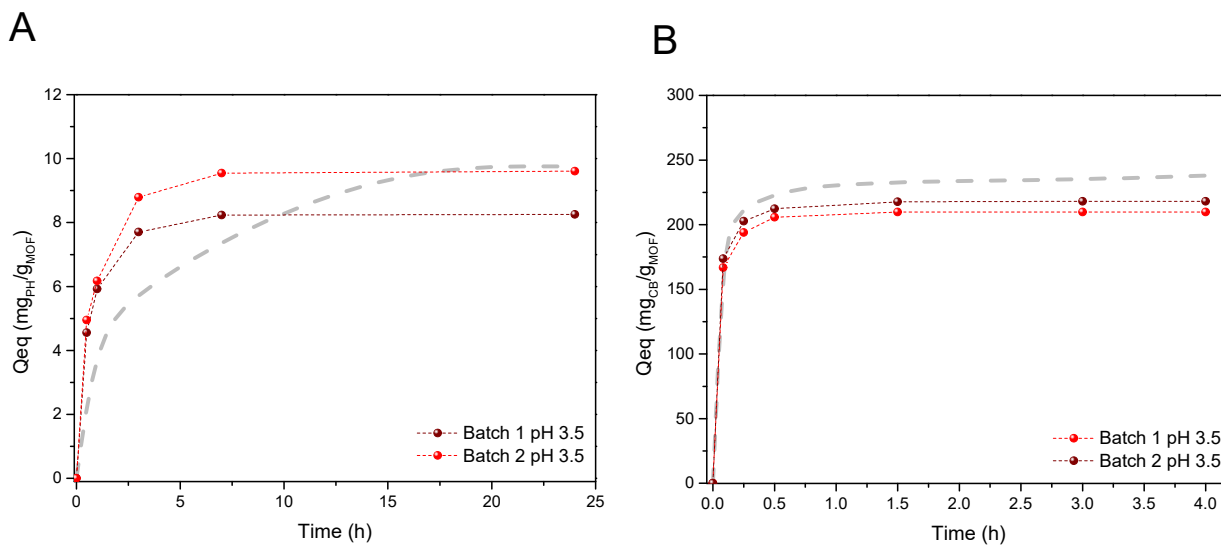

**Figure S6.** Adsorption kinetic studies for (A) phenol and (B) chlorobenzene at 298 K in ZIF-71 sample under acidic conditions (pH 3.5 adjusted using a HCl solution). Average adsorption kinetics (data from Figure S2), obtained under non-modified pH conditions, have been added as a grey slashed line for the sake of comparison.

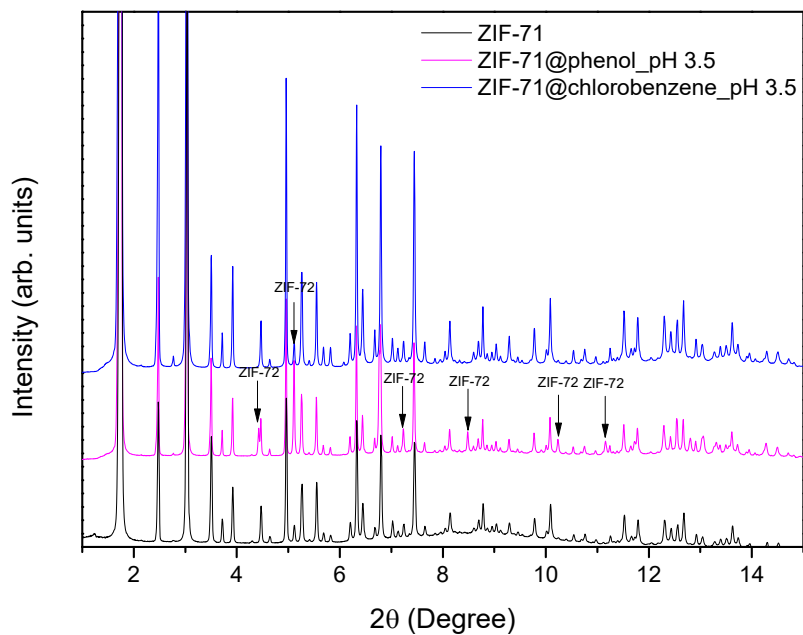

**Figure S7.** Synchrotron X-ray powder diffraction patterns of ZIF-71 before and after the chlorobenzene and phenol adsorption tests under acidic conditions (beam energy 20 keV).

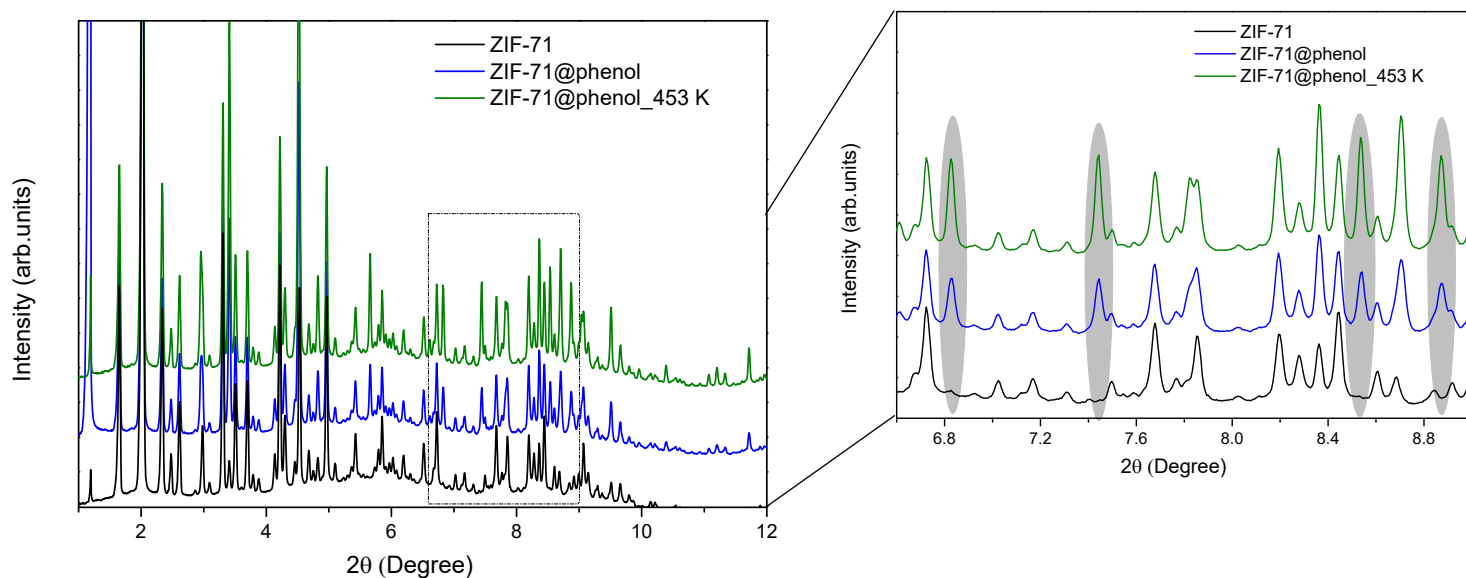

**Figure S8.** Synchrotron X-ray powder diffraction patterns of ZIF-71 before and after the phenol adsorption tests (beam energy 30 keV). The used sample was submitted to a thermal treatment at 453 K to promote the phase transition. Low 2 Theta peaks in ZIF-71@phenol (ca.  $1.2^\circ$ ) correspond to entrapped water.



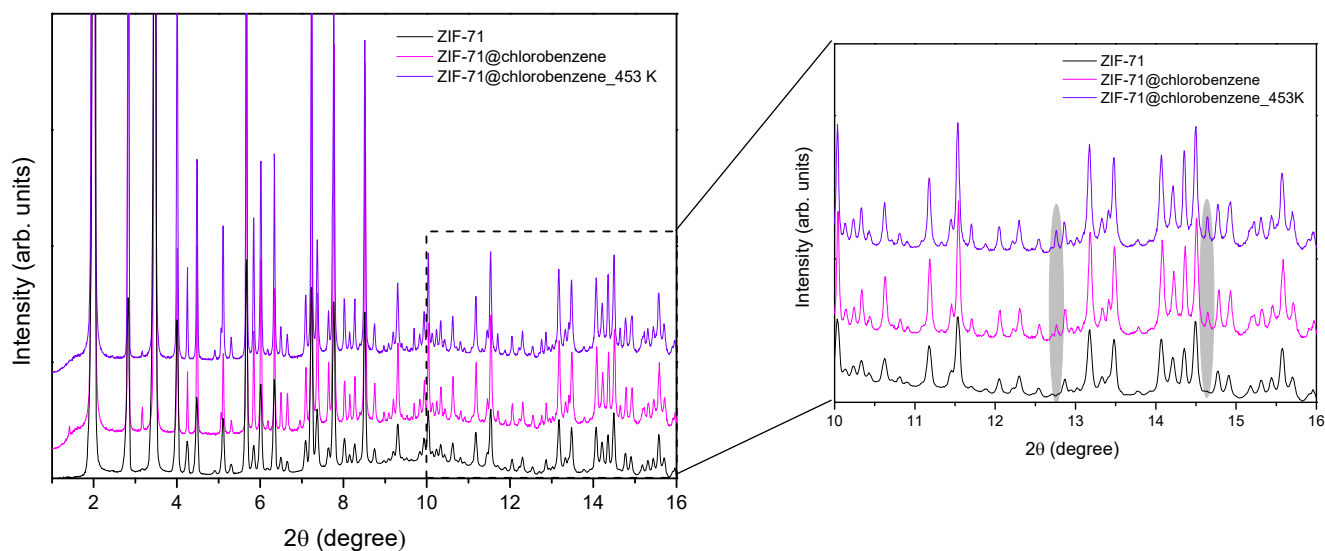

**Figure S9.** Synchrotron X-ray powder diffraction patterns of ZIF-71 before and after the chlorobenzene adsorption tests (beam energy 17.5 keV). The used sample was submitted to a thermal treatment at 453 K to promote the phase transition.

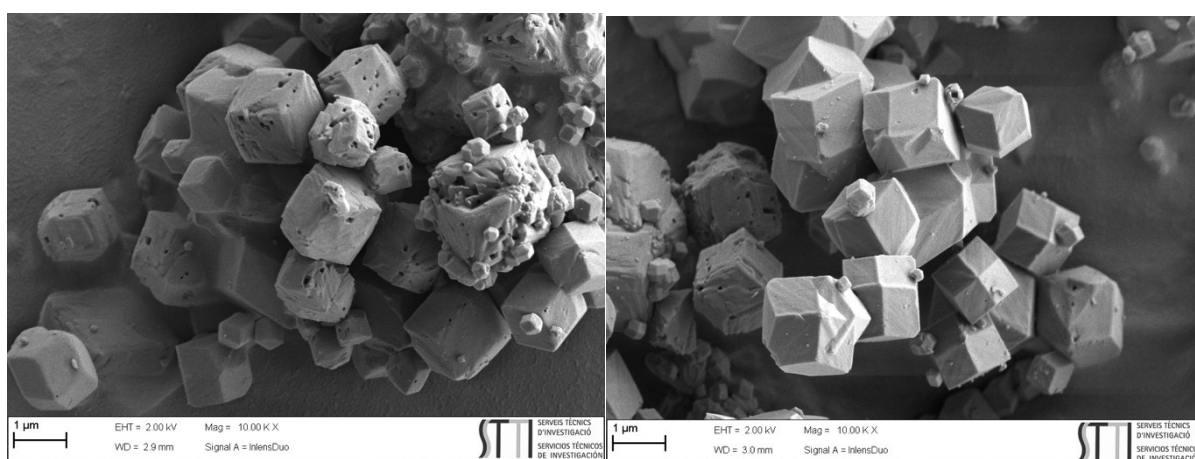

**Figure S10.** Representative FESEM images of ZIF-71 after the phenol adsorption process, a subsequent drying and a heat treatment at 453 K.

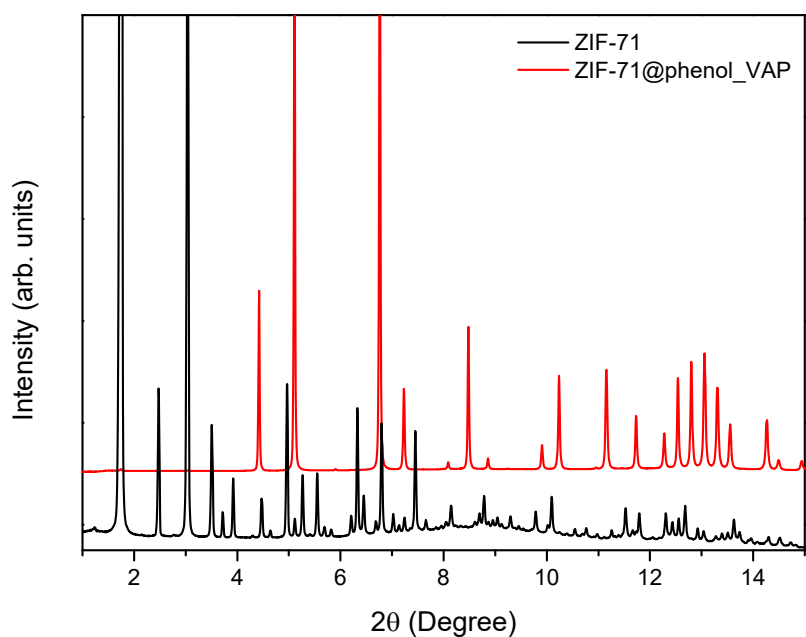

**Figure S11.** Synchrotron X-ray powder diffraction patterns of ZIF-71 before and after exposure to the vapors of an aqueous solution of phenol (50 ppm) (beam energy 20 keV).

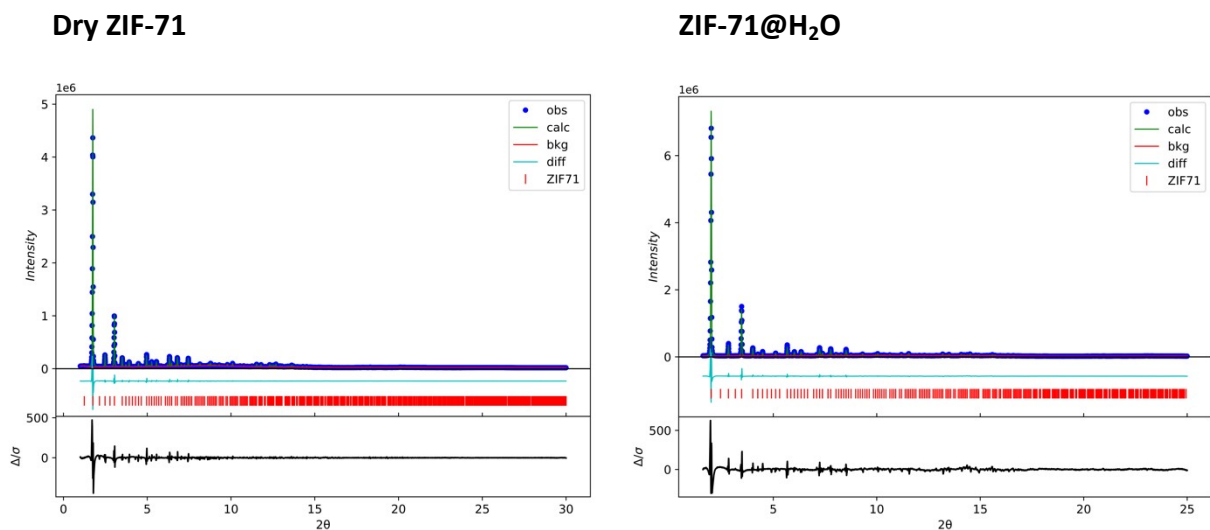

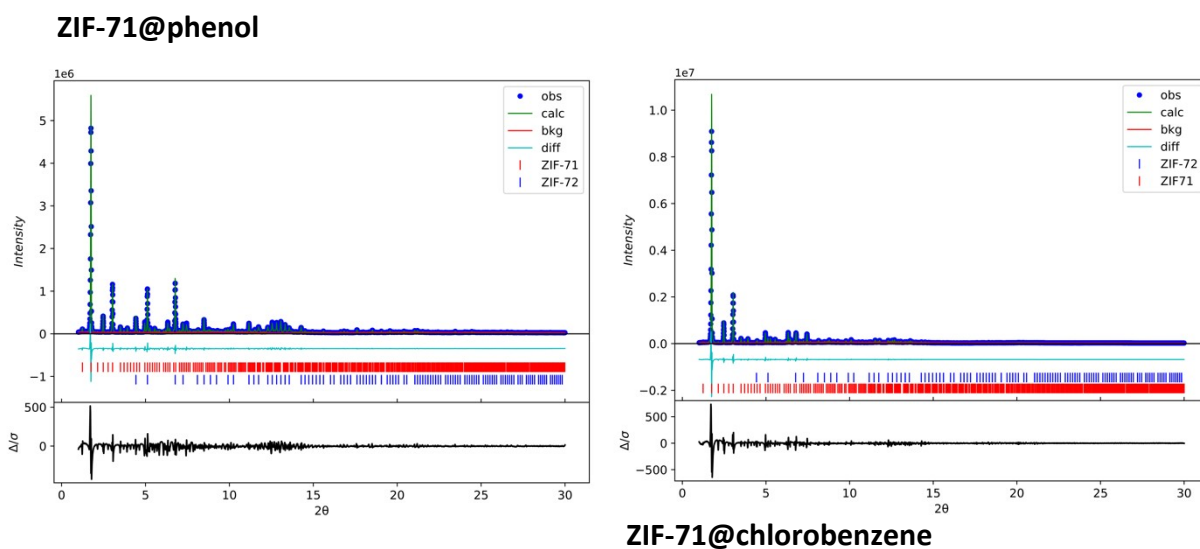

**Figure S12.** Rietveld refinement of the different SXRPD patterns obtained.

## TABLES

**Table S1:** Lennard-Jones parameters and partial charges of the atoms from the structures. Different types of atoms were defined for a given element according to their chemical environment. The proposed labelling of atoms is shown below.

| Atom Type | $\epsilon/k_B$ (K) | $\sigma$ (Å) | charge ( $e^-$ ) |
|-----------|--------------------|--------------|------------------|
| Zn1       | 62.40              | 2.462        | 0.7              |

|     |        |       |          |
|-----|--------|-------|----------|
| C1  | 52.84  | 3.431 | 0.0371   |
| H1  | 22.14  | 2.571 | 0.049    |
| N2  | 34.72  | 3.261 | -0.19355 |
| C3  | 52.84  | 3.431 | 0.0189   |
| Cl4 | 114.23 | 3.517 | -0.0434  |

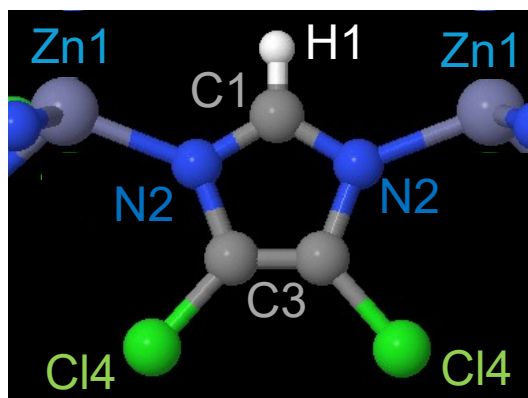

**Table S2.** Henry coefficients and Heat of adsorption for the three probes evaluated obtained from the GCMC simulations.

| Henry Coefficient (ml/kg/Pa) |                   |                                           |                                           |                                               |                                          |
|------------------------------|-------------------|-------------------------------------------|-------------------------------------------|-----------------------------------------------|------------------------------------------|
| ZIF-71                       |                   |                                           | ZIF-72                                    |                                               |                                          |
| phenol                       | chlorobenzene     | water                                     | phenol                                    | chlorobenzene                                 | water                                    |
| $1.10 \pm 0.01$              | $0.135 \pm 0.001$ | $1.1 \cdot 10^{-6} \pm 9.6 \cdot 10^{-9}$ | $1.0 \cdot 10^{-95} \pm 4 \cdot 10^{-95}$ | $1.1 \cdot 10^{-142} \pm 4.6 \cdot 10^{-142}$ | $1.2 \cdot 10^{-9} \pm 2 \cdot 10^{-11}$ |

| Heat of Adsorption (kJ/mol) |                   |                   |              |               |                  |
|-----------------------------|-------------------|-------------------|--------------|---------------|------------------|
| ZIF-71                      |                   |                   | ZIF-72       |               |                  |
| phenol                      | chlorobenzene     | water             | phenol       | chlorobenzene | water            |
| $-66.63 \pm 0.11$           | $-61.49 \pm 0.70$ | $-13.89 \pm 0.10$ | $491 \pm 30$ | $780 \pm 57$  | $-6.72 \pm 0.06$ |

**Table S3:** Structural parameters calculated for ZIF-71 before (pristine) and after being applied in the phenol and chlorobenzene adsorption process. The amount of ZIF-72 determined from the Rietveld refinement is included for each specific case.

| Sample               | ZIF-71  |       | ZIF-72       |       |
|----------------------|---------|-------|--------------|-------|
|                      | a, Å    | wt.%% | a, Å         | wt.%% |
| ZIF-71 dry           | 28.6387 | 100%  | Not observed |       |
| ZIF-71@phenol        | 28.6428 | 46.5  | 19.6513      | 53.5  |
| ZIF-71@chlorobenzene | 28.6304 | 100%  | Not observed |       |
